# Supplementary material for: Formation of a Criegee intermediate in the low-temperature oxidation of dimethyl sulfoxide
Source: Royal Society of Chemistry journal article supplement (doi:10.1039/b716179d), 2008-01-01
Supplement: b716179d.pdf [file b716179d.pdf]

### Electronic Supplementary Information

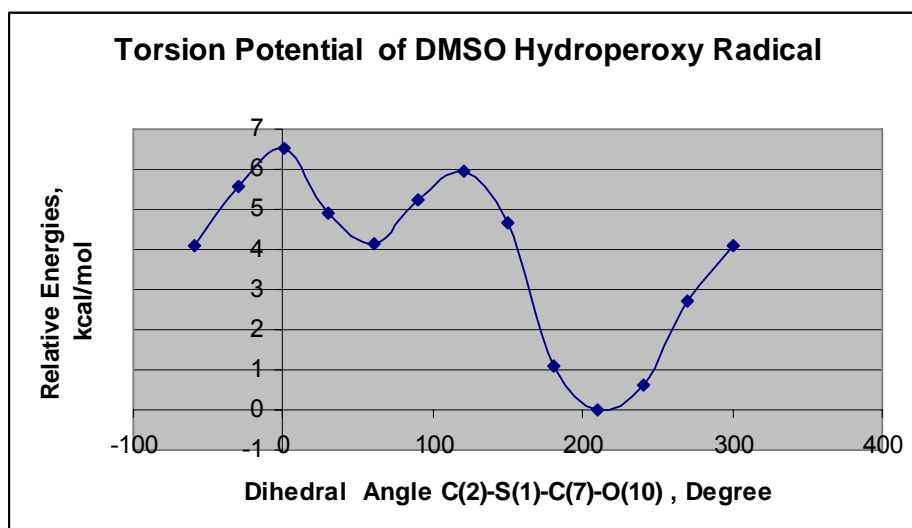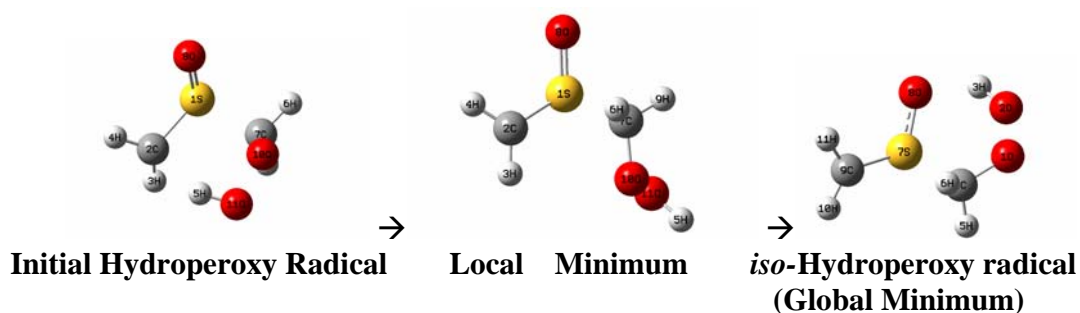

**Table S1.** Pressure Dependent Rate Coefficients from the Chemical Activation Analysis for the Reaction of  $\text{CH}_3\text{S(=O)CH}_2\cdot + \text{O}_2$  System.  $k = A T^n \exp(-E_a/RT)$

| Reaction                                                                                                | A        | n      | $E_a$ | P       |
|---------------------------------------------------------------------------------------------------------|----------|--------|-------|---------|
| $\text{CS(O)CJ} + \text{O}_2 \rightleftharpoons \text{CH}_2\text{OO} + \text{CH}_3\text{SO}\cdot$       | 1.85E+16 | -1.14  | 1048. | 0.01-10 |
|                                                                                                         | 2.87E+16 | -1.20  | 1160. | 100     |
| $\text{CS(O)CJ} + \text{O}_2 \rightleftharpoons \text{CJS(O)CQ}$                                        | 2.93E+29 | -10.72 | 6215. | 0.01    |
|                                                                                                         | 1.22E+31 | -10.90 | 6164. | 0.1     |
|                                                                                                         | 1.09E+32 | -10.86 | 5580. | 1.0     |
|                                                                                                         | 5.27E+34 | -11.35 | 3581. | 10      |
|                                                                                                         | 5.76E+49 | -15.06 | 7014. | 100     |
| $\text{CS(O)CJ} + \text{O}_2 \rightleftharpoons \text{CH}_2\text{SO} + \text{CH}_2\text{O} + \text{OH}$ | 1.81E+14 | -1.20  | 1255. | 0.01    |
|                                                                                                         | 1.81E+14 | -1.20  | 1255. | 0.1     |
|                                                                                                         | 1.81E+14 | -1.20  | 1254. | 1.0     |
|                                                                                                         | 1.78E+14 | -1.20  | 1249. | 10      |
|                                                                                                         | 2.36E+14 | -1.23  | 1309. | 100     |

<sup>a</sup> rate constants;  $\text{N}_2$  bath gas; P (atm).  $\Delta E_{\text{down}} 830 \text{ cal.}$ ,  $e/k 697.\text{K}^{-1}$  and  $\sigma 5.84 \text{ \AA}^2$   
 Units:  $\text{cm}^3 \text{ mole}^{-1} \text{ sec}^{-1}$ ,  $E_a$  in  $\text{cal mol}^{-1}$

**Table S2.** Pressure Dependent Rate Coefficients from the Unimolecular Dissociation Analysis for the Reaction of  $\text{CH}_3\text{S(=O)CH}_2\bullet + \text{O}_2$  System.  
 $k = A T^n \exp(-E_a/RT)$

| Reaction                                                                  | A        | n     | $E_a$  | P    |
|---------------------------------------------------------------------------|----------|-------|--------|------|
| CS(O)COOJ $\rightleftharpoons$ CS(O)CJ + O <sub>2</sub>                   | 6.57E-20 | 6.82  | 19583. | 0.01 |
|                                                                           | 3.75E-04 | 2.22  | 23643. | 0.1  |
|                                                                           | 2.74E-18 | 7.13  | 18651. | 1.0  |
|                                                                           | 2.73E-09 | 4.69  | 18705. | 10   |
|                                                                           | 9.90E+36 | -8.63 | 32076. | 100  |
| CS(O)COOJ $\rightleftharpoons$ CH <sub>2</sub> OO + CH <sub>3</sub> SO•   | 1.18E-10 | 5.72  | 9031.  | 0.01 |
|                                                                           | 7.43E+05 | 1.12  | 13215. | 0.1  |
|                                                                           | 2.63E+01 | 2.99  | 12038. | 1.0  |
|                                                                           | 4.66E+01 | 3.28  | 12428. | 10   |
|                                                                           | 2.09E+33 | -6.34 | 23026. | 100  |
| CS(O)COOJ $\rightleftharpoons$ CJS(O)CQ                                   | 7.18E-06 | 4.41  | 9415.  | 0.01 |
|                                                                           | 5.36E+01 | 2.54  | 11881. | 0.1  |
|                                                                           | 6.06E+14 | -1.41 | 16341. | 1.0  |
|                                                                           | 8.81E+06 | 1.16  | 14134. | 10   |
|                                                                           | 1.40E+28 | -5.34 | 21215. | 100  |
| CJS(O)CQ $\rightleftharpoons$ CH <sub>2</sub> SO + CH <sub>2</sub> O + OH | 4.54E+01 | 2.20  | 7247.  | 0.01 |
|                                                                           | 4.48E+02 | 2.20  | 7246.  | 0.1  |
|                                                                           | 3.94E+03 | 2.22  | 7236.  | 1.0  |
|                                                                           | 8.95E+03 | 2.44  | 7125.  | 10   |
|                                                                           | 4.28E-09 | 6.42  | 2228.  | 100  |
| CJS(O)CQ $\rightleftharpoons$ CS(O)COOJ                                   | 1.10E+00 | 2.24  | 7230.  | 0.01 |
|                                                                           | 1.08E+01 | 2.24  | 7229.  | 0.1  |
|                                                                           | 9.56E+01 | 2.26  | 7220.  | 1.0  |
|                                                                           | 2.24E+02 | 2.47  | 7112.  | 10   |
|                                                                           | 3.00E-11 | 6.63  | 2044.  | 100  |

<sup>a</sup> Rate constants; N<sub>2</sub> bath gas; see table S1 for L-J parameters  
 Units: sec<sup>-1</sup>, E<sub>a</sub> in cal mol<sup>-1</sup>, P in atm

**Table S3.** Calculated Ideal Gas- Phase Thermodynamic Properties<sup>a</sup>

| Species              | $\Delta H_f^{\circ}{}_{298}$ <sup>b</sup> | $S^{\circ}{}_{298}$ <sup>c</sup> | $C_{p(300)}$ <sup>c</sup> | $C_{p(400)}$ <sup>c</sup> | $C_{p(500)}$ <sup>c</sup> | $C_{p(600)}$ <sup>c</sup> | $C_{p(800)}$ <sup>c</sup> | $C_{p(1000)}$ <sup>c</sup> | $C_{p(1500)}$ <sup>c</sup> |
|----------------------|-------------------------------------------|----------------------------------|---------------------------|---------------------------|---------------------------|---------------------------|---------------------------|----------------------------|----------------------------|
| CS(O)C•              | 13.00                                     | 72.91                            | 21.61                     | 25.49                     | 28.64                     | 31.18                     | 35.06                     | 37.97                      | 42.67                      |
| CS(O)COO•            | -16.70                                    | 85.02                            | 26.63                     | 31.72                     | 36.01                     | 39.48                     | 44.65                     | 48.31                      | 53.87                      |
| CH <sub>2</sub> OO   | 26.70                                     | 58.19                            | 11.32                     | 13.40                     | 15.16                     | 16.60                     | 18.74                     | 20.26                      | 22.57                      |
| CH <sub>3</sub> SO•  | -18.95                                    | 65.32                            | 14.01                     | 16.29                     | 18.28                     | 19.95                     | 22.53                     | 24.44                      | 27.46                      |
| C•S(O)CQ             | -2.75                                     | 86.53                            | 28.71                     | 33.87                     | 37.92                     | 41.09                     | 45.70                     | 48.99                      | 54.11                      |
| CH <sub>2</sub> SO   | -7.10                                     | 61.14                            | 12.34                     | 14.53                     | 16.25                     | 17.57                     | 19.46                     | 20.79                      | 22.84                      |
| HOCH <sub>2</sub> SO | -55.22                                    | 72.49                            | 16.93                     | 19.94                     | 22.47                     | 24.51                     | 27.55                     | 29.70                      | 32.99                      |
| IC•S(O)CQ            | -5.77                                     | 84.90                            | 28.55                     | 33.74                     | 37.81                     | 40.98                     | 45.61                     | 48.91                      | 54.06                      |
| TS0                  | 13.5                                      | 95.00                            | 28.97                     | 33.21                     | 36.71                     | 39.57                     | 43.94                     | 47.16                      | 52.25                      |
| TS1                  | 0.39                                      | 80.83                            | 25.25                     | 30.94                     | 35.52                     | 39.11                     | 44.26                     | 47.76                      | 52.85                      |
| TS2                  | 17.17                                     | 82.94                            | 26.52                     | 31.99                     | 36.17                     | 39.37                     | 43.95                     | 47.17                      | 52.19                      |
| TS3                  | -1.00                                     | 85.96                            | 26.96                     | 32.18                     | 36.22                     | 39.34                     | 43.88                     | 47.12                      | 52.18                      |
| TS4                  | 1.65                                      | 91.56                            | 26.93                     | 31.55                     | 35.44                     | 38.60                     | 43.35                     | 46.77                      | 52.07                      |

<sup>a</sup> Thermodynamic properties are referred to standard state of an ideal gas of pure enantiomer at 1 atm.

<sup>b</sup> Units in kcal mol<sup>-1</sup>. <sup>c</sup> Units in cal mol<sup>-1</sup> K<sup>-1</sup>.

**Table S4.**  $\Delta H_f^{\circ}{}_{298}$  Values by Isodesmic Reaction Analysis at CBS- QB3 level<sup>a</sup>

| No   | Reaction                                                                                                                                                                                            | $\Delta H_f^{\circ}{}_{298}$ <sup>b</sup> | Mean                     |
|------|-----------------------------------------------------------------------------------------------------------------------------------------------------------------------------------------------------|-------------------------------------------|--------------------------|
| V    | $(\text{CH}_3)_2\text{S} + \text{SO}_3 \rightarrow \text{CH}_3\text{S}(=\text{O})\text{CH}_3 + \text{SO}_2$                                                                                         | -35.85                                    | -35.97±0.3               |
| VI   | $(\text{CH}_3)_2\text{S} + \text{SO}_2 \rightarrow \text{CH}_3\text{S}(=\text{O})\text{CH}_3 + \text{SO}$                                                                                           | -36.53                                    | (-36.1±0.3) <sup>c</sup> |
| VII  | $(\text{CH}_3)_2\text{S} + \text{CH}_3\text{S}(=\text{O})\text{OH} \rightarrow \text{CH}_3\text{S}(=\text{O})\text{CH}_3 + \text{CH}_3\text{SOH}$                                                   | -36.15                                    |                          |
| VIII | $\text{CH}_3\text{S}(=\text{O})\text{OH} + \text{CH}_3\text{S}(=\text{O})\text{OH} \rightarrow \text{CH}_3\text{S}(=\text{O})\text{CH}_3 + \text{H}_2\text{SO}_3$                                   | -35.90                                    |                          |
| IX   | $\text{CH}_3\text{S}(\text{O})\text{CH}_2\bullet + \text{CH}_3\text{C}(\text{O})\text{CH}_3 \rightarrow \text{CH}_3\text{S}(\text{O})\text{CH}_3 + \text{CH}_3\text{C}(\text{O})\text{CH}_2\bullet$ | 13.20                                     | 13.0±0.3 <sup>d</sup>    |
| X    | $\text{CH}_3\text{S}(\text{O})\text{CH}_2\bullet + \text{CH}_3\text{SCH}_3 \rightarrow \text{CH}_3\text{S}(\text{O})\text{CH}_3 + \text{CH}_3\text{SCH}_2\bullet$                                   | 13.23                                     |                          |
| XI   | $\text{CH}_2\text{OO} + \text{CH}_3\text{CH}_2\text{OOH} = \text{CH}_3\text{OO} + \text{CH}_2\text{CH}_2\text{OOH}$                                                                                 | 24.78                                     | 25.3±0.7                 |
| XII  | $\text{CH}_2\text{OO} + \text{CH}_3\text{S}\bullet = \text{O} = \text{CH}_2 = \text{S} = \text{O} + \text{CH}_3\text{OO}\bullet$                                                                    | 25.80                                     |                          |
| XIII | $\text{CH}_3\text{S}(\text{O})\text{CH}_2\text{OOH} + \text{C}_2\text{H}_6 = \text{C}_2\text{H}_5\text{OOH} + \text{CH}_3\text{S}(\text{O})\text{CH}_3$                                             | -52.04                                    | -52.0±0.5                |
| XIV  | $\text{CH}_3\text{S}(\text{O})\text{CH}_2\text{OO}\bullet + \text{C}_2\text{H}_5\text{OOH} = \text{CH}_3\text{S}(\text{O})\text{CH}_2\text{OOH} + \text{C}_2\text{H}_5\text{OO}\bullet$             | -16.07                                    | -16.0±0.5                |

<sup>a</sup> Units in kcal mol<sup>-1</sup>.

<sup>b</sup>  $\Delta H_f^{\circ}{}_{298}$  are evaluated for species in bold.

<sup>c</sup> Including reaction V, see text.

<sup>d</sup> G3MP2 values 13.1 and 12.8 kcal mol<sup>-1</sup>, respectively.

**TABLE S5.** Moments of Inertia and Harmonic Frequencies for Stable Species and Transition States of DMSO radical+O<sub>2</sub> System Calculated at CBS-QB3 (B3LYP/6-311(2d,d,p) Level of Theory

| DMSO - (CH <sub>3</sub> ) <sub>2</sub> SO                                                                                                                                                                                                                                                                                                                                                                                                                                  | CH <sub>2</sub> OO Criegee Intermediate                                                                                                                                                                                                                                                                                                                                                                                                                                                                                             |
|----------------------------------------------------------------------------------------------------------------------------------------------------------------------------------------------------------------------------------------------------------------------------------------------------------------------------------------------------------------------------------------------------------------------------------------------------------------------------|-------------------------------------------------------------------------------------------------------------------------------------------------------------------------------------------------------------------------------------------------------------------------------------------------------------------------------------------------------------------------------------------------------------------------------------------------------------------------------------------------------------------------------------|
| Moments of Inertia<br>262.26561 267.26824 438.02553                                                                                                                                                                                                                                                                                                                                                                                                                        | Moments of Inertia<br>22.14098 145.78404 167.92502                                                                                                                                                                                                                                                                                                                                                                                                                                                                                  |
| Rotational symmetry number =1<br>Frequencies and Mode Symmetries                                                                                                                                                                                                                                                                                                                                                                                                           | Rotational symmetry number =1<br>Frequencies , cm <sup>-1</sup>                                                                                                                                                                                                                                                                                                                                                                                                                                                                     |
| A''    A'    A'<br>168.8949    218.8175    283.5035<br>A''    A'    A'<br>307.1042    364.0445    621.6439<br>A''    A''    A''<br>647.4632    888.6718    919.5535<br>A'    A'    A'<br>949.0905    1023.6540    1081.8654<br>A''    A'    A''<br>1311.6987    1335.3925    1440.1104<br>A'    A''    A'<br>1454.1967    1461.4659    1479.7128<br>A''    A'    A''<br>3033.8264    3036.5707    3131.3974<br>A'    A''    A'<br>3136.1891    3140.1328    3140.9399      | 534.6725    674.6157    909.0898<br>934.7144    1241.3275    1397.0314<br>1527.0600    3120.8985    3277.7258<br><br>-----<br><b>CH<sub>3</sub>SO Radical</b><br>-----<br><br>Moments of Inertia<br>66.50653 217.35652 272.35890<br><br>Rotational symmetry number = 1<br>Frequencies , cm <sup>-1</sup><br>127.7150    324.4862    653.8976<br>892.9507    943.9439    1024.2449<br>1324.6069    1445.0163    1463.2263<br>3032.6082    3127.3942    3129.0256                                                                     |
| -----<br><b>CH<sub>2</sub>S(=O)CH<sub>3</sub> radical</b><br>-----<br><br>Moments of Inertia<br>240.64071 256.25362 429.87763<br><br>Rotational symmetry number =1<br>Frequencies , cm <sup>-1</sup><br>182.6354    199.6671    276.1630<br>315.7265    351.2717    532.5719<br>612.3649    698.4518    873.0149<br>934.8898    962.2079    1101.1821<br>1313.2021    1376.1867    1445.6841<br>1466.4446    3045.1619    3128.3437<br>3147.6541    3155.7291    3260.2330 | -----<br><b>DMSO- HydroPeroxy Radical</b><br>-----<br><br>Moments of Inertia<br>370.67203 843.07657 998.47360<br><br>Rotational symmetry number =1<br>Frequencies , cm <sup>-1</sup><br>73.2460    165.0182    187.5140<br>251.8186    267.8310    294.8649<br>386.5278    439.5818    485.9551<br>564.6362    632.0443    719.0699<br>851.7171    899.2047    944.6762<br>1068.2105    1110.8811    1260.8332<br>1281.7296    1378.5498    1423.9531<br>1428.6596    3047.9899    3120.4260<br>3134.9645    3246.1662    3595.5035 |

-----  
**DMSO-Peroxy Radical**  
-----

Moments of Inertia  
314.18672 945.55132 1149.89038

Rotational symmetry number =1

Frequencies , cm<sup>-1</sup>  
40.0695 129.0916 186.2374  
214.5887 281.4950 294.0743  
357.8490 513.2647 627.9165  
673.3358 873.3470 923.5972  
943.9897 1007.5110 1072.9164  
1127.5916 1241.4755 1280.6893  
1328.4677 1440.8372 1447.6534  
1467.0573 3041.5609 3079.8831  
3142.6453 3150.1064 3167.9708

-----  
**TS0 B3LYP/6-31G(d,p)**  
-----

Moments of Inertia  
285.43164 1503.35777 1675.22884

Rotational symmetry number =1

Frequencies , cm<sup>-1</sup>  
-53.7730 18.3002 36.3096  
74.2805 159.0016 219.3531  
262.4058 293.1510 311.8120  
381.2916 642.2069 667.1626  
740.3567 883.2967 957.2252  
1000.8743 1055.6929 1343.5690  
1412.2391 1461.3681 1478.6991  
1583.0002 3058.6813 3137.5511  
3164.1625 3169.0556 3272.4715

-----  
**TS1**  
-----

Moments of Inertia  
365.54394 780.18029 939.61041

Rotational symmetry number =1

Frequencies , cm<sup>-1</sup>  
-1420.4367 100.4786 222.0136  
305.3335 342.4053 411.6133  
456.6230 462.9131 551.6904

-----  
**Criegee Complex**  
-----

Moments of Inertia  
365.4473 1310.1965 1589.4898

Rotational symmetry number =1

Frequencies , cm<sup>-1</sup>  
22.6250 53.0778 71.5629  
99.6911 118.2841 131.5234  
141.5722 329.5168 530.0592  
659.5145 674.8720 901.0576  
907.6049 943.2509 959.4638  
1014.1488 1237.8170 1317.8025  
1403.5007 1457.8062 1461.2647  
1540.8498 3036.5002 3124.5742  
3125.9319 3149.6405 3278.4835

-----  
**TS3**  
-----

Moments of Inertia  
345.13759 950.17998 1116.50476

Rotational symmetry number =1

Frequencies , cm<sup>-1</sup>  
-133.1409 39.5471 155.7290  
217.3997 234.2900 306.6027  
381.6247 487.4728 547.7513  
611.6223 666.1437 682.6401  
842.6242 868.4682 922.5385  
944.8599 1046.5453 1176.6544  
1226.6492 1385.9893 1444.6839  
1515.2704 3099.9572 3137.6448  
3235.3980 3265.9754 3383.4550

-----  
**TS4**  
-----

Moments of Inertia  
341.72291 1261.46435 1486.67946

Rotational symmetry number =1

Frequencies , cm<sup>-1</sup>  
-74.8706 39.2476 93.7262  
116.1029 133.9727 152.4811  
246.0159 339.9794 526.2031

Supplementary Material for PCCP  
This journal is © The Owner Societies 2007

|           |           |           |           |           |           |
|-----------|-----------|-----------|-----------|-----------|-----------|
| 617.3079  | 691.8962  | 883.7910  | 655.8439  | 701.6367  | 854.7111  |
| 934.0215  | 960.4311  | 979.4012  | 906.3579  | 920.1838  | 961.4358  |
| 1065.1988 | 1114.7808 | 1156.9182 | 1034.7590 | 1224.6086 | 1290.3056 |
| 1252.5794 | 1258.8339 | 1384.1413 | 1338.1959 | 1449.1456 | 1460.8131 |
| 1437.0556 | 1589.0079 | 3050.6530 | 1478.7499 | 3018.1445 | 3115.3092 |
| 3083.2885 | 3152.1970 | 3188.4822 | 3130.5319 | 3134.1357 | 3286.3569 |

| TS2                            |           |           | TS5                            |            |            |
|--------------------------------|-----------|-----------|--------------------------------|------------|------------|
| Moments of Inertia             |           |           | Moments of Inertia             |            |            |
| 438.65621                      | 654.87975 | 771.01003 | 352.79215                      | 1063.98452 | 1239.44861 |
| Rotational symmetry number =1  |           |           | Rotational symmetry number =1  |            |            |
| Frequencies , cm <sup>-1</sup> |           |           | Frequencies , cm <sup>-1</sup> |            |            |
| -1270.6050                     | 49.8236   | 214.3457  | -193.5984                      | 33.9878    | 74.2263    |
| 290.3236                       | 291.9888  | 391.7651  | 90.5684                        | 134.1590   | 185.8056   |
| 409.4249                       | 475.3226  | 517.7121  | 273.9336                       | 338.0006   | 531.7436   |
| 578.4372                       | 602.6344  | 670.6509  | 536.5105                       | 657.3941   | 667.3450   |
| 772.5047                       | 868.7722  | 935.9450  | 907.1489                       | 935.4982   | 947.2166   |
| 1029.1443                      | 1063.8853 | 1107.9908 | 1084.9111                      | 1203.1560  | 1257.7271  |
| 1213.0008                      | 1258.9671 | 1379.4292 | 1317.9861                      | 1444.5311  | 1455.0249  |
| 1445.9966                      | 2997.0669 | 3068.0889 | 1461.6582                      | 3041.6034  | 3137.4399  |
| 3123.4995                      | 3255.1753 | 3714.6578 | 3146.7801                      | 3148.5328  | 3303.7495  |

**Table S6 Thermochemical Parameters Calculated at CBS-QB3 Level**

|                                                     | $\Delta G_{298}^{\circ}$ * | $\Delta H_{298}^{\circ}$ | $\Delta S_{298}^{\circ}$              |
|-----------------------------------------------------|----------------------------|--------------------------|---------------------------------------|
|                                                     | Hartrees                   | Hartrees                 | cal mol <sup>-1</sup> K <sup>-1</sup> |
| <b>Peroxy Radical</b>                               | <b>-702.082606</b>         | <b>-702.040996</b>       | <b>87.386</b>                         |
| <b>TS4</b>                                          | <b>-702.055647</b>         | <b>-702.011909</b>       | <b>91.862</b>                         |
| <b>VdW Criegee</b>                                  | <b>-702.061535</b>         | <b>-702.013817</b>       | <b>100.219</b>                        |
| CH <sub>2</sub> OO+CH <sub>3</sub> SO               | -702.067021                | -702.006538              | 127.202                               |
| CH <sub>2</sub> OO                                  | -189.367160                | -189.338845              | 59.560                                |
| CH <sub>3</sub> SO                                  | -512.699861                | -512.667693              | 67.642                                |
| <b>TS5</b>                                          | <b>-702.046565</b>         | <b>-702.002452</b>       | <b>92.646</b>                         |
| <b>CH<sub>3</sub>SO<sub>2</sub>+CH<sub>2</sub>O</b> | <b>-702.202522</b>         | <b>-702.142932</b>       | <b>125.32</b>                         |
| CH <sub>3</sub> SO <sub>2</sub>                     | -587.836731                | -587.802610              | 71.721                                |
| CH <sub>2</sub> O                                   | -114.365791                | -114.340322              | 53.599                                |

\*- Gibbs Free Energies  $\Delta G_{298}^{\circ} = \Delta H_{298}^{\circ} - T\Delta S_{298}^{\circ}$  calculated at 298.15 K

$\Delta G_{298}^{\circ}$  (TS4) = -702.011909 + (298.15K x 91.862 cal/mol-K)/ 1000 x 627.5 =  
-702.011909 + 0.043647 = -702.055556 (Gaussian exact output = -702.055647)
